# Supplementary material
Source: HighWire-hosted journal article supplement (https://thorax.bmj.com/content/72/1/31)

**Effectiveness of discharge care bundles on quality of life for patients with AECOPD (RCT data only)**

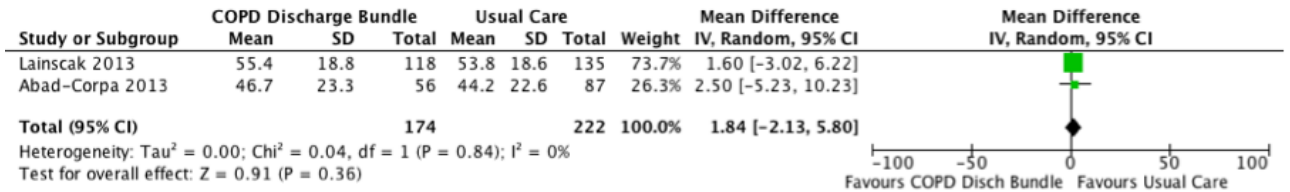

Supplement: inline-supplementary-material-2 [file inline-supplementary-material-2.pdf]
